## CORRECTION

# Correction: Evaluation of TNF- $\alpha$ , IL-10 and IL-6 Cytokine Production and Their Correlation with Genotype Variants amongst Tuberculosis Patients and Their Household Contacts

The *PLOS ONE* Editors

## Notice of Republication

This article [1] was republished on November 19, 2024, to address an issue identified post-publication. Please download this article again to view the correct version.

The article's Data Availability statement is updated to: All relevant data are within the paper and its Supporting Information files.

## Reference

1. Joshi L, Ponnana M, Sivangala R, Chelluri LK, Nallari P, Penmetsa S, et al. (2015) Evaluation of TNF- $\alpha$ , IL-10 and IL-6 Cytokine Production and Their Correlation with Genotype Variants amongst Tuberculosis Patients and Their Household Contacts. *PLoS ONE* 10(9): e0137727. <https://doi.org/10.1371/journal.pone.0137727> PMID: 26359865

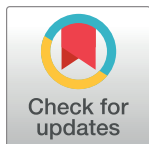

## OPEN ACCESS

**Citation:** The *PLOS ONE* Editors (2025) Correction: Evaluation of TNF- $\alpha$ , IL-10 and IL-6 Cytokine Production and Their Correlation with Genotype Variants amongst Tuberculosis Patients and Their Household Contacts. *PLoS ONE* 20(1): e0317538. <https://doi.org/10.1371/journal.pone.0317538>

**Published:** January 9, 2025

**Copyright:** © 2025 The PLOS ONE Editors. This is an open access article distributed under the terms of the [Creative Commons Attribution License](https://creativecommons.org/licenses/by/4.0/), which permits unrestricted use, distribution, and reproduction in any medium, provided the original author and source are credited.
